# Supplementary material
Source: Research Square preprint supplement (doi:10.21203/rs.3.rs-9230830/v1)

# Distribution of Propensity Score Weights by Method

Extreme weights (>10) may indicate poor covariate overlap

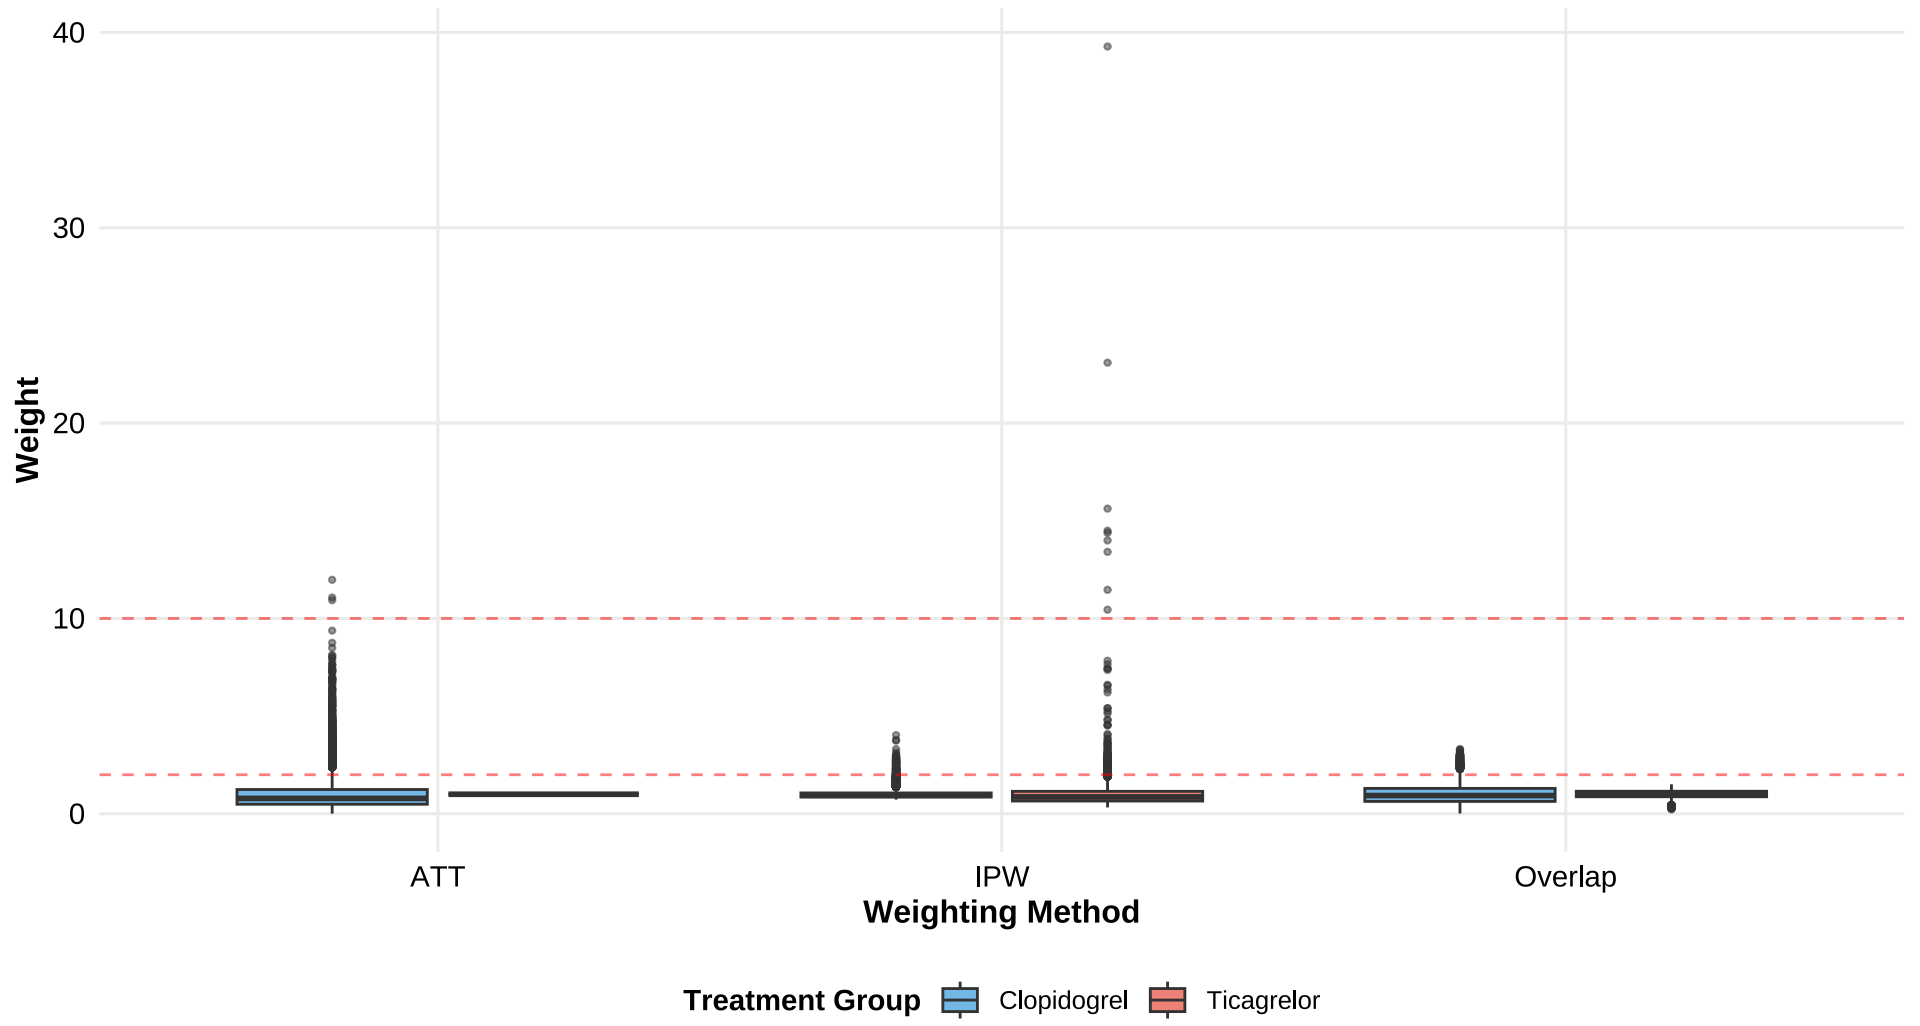

Supplement: Supplementary file 2 [file 475340d514f60e5f0e13173c.pdf]
