# Supplementary material
Source: Research Square preprint supplement (doi:10.21203/rs.3.rs-9230830/v1)
Supplement: Supplementary file 5 [file 712a0e78c0c8c686043fa3dd.docx]

**Supplementary List**

### **Supplementary Tables**

**Supplementary Table 1.** Baseline Characteristics: Dual High-Risk vs Non-Dual High-Risk Patients
**Supplementary Table 2.** Clinical Outcomes: Dual High-Risk vs Non-Dual High-Risk Patients
**Supplementary Table 3.** Summary of Missing Data Before Multiple Imputation
**Supplementary Table 4.** Comparison of Baseline Characteristics Before and After Multiple Imputation
**Supplementary Table 5.** Baseline Characteristics Before and After Inverse Probability Weighting
**Supplementary Table 6.** Baseline Characteristics Before and After ATT Weighting
**Supplementary Table 7.** Sensitivity Analysis: Clinical Outcomes by Different Weighting Methods

### **Supplementary Figures**

**Supplementary Figure S1.** Prevalence of High Ischemic Risk Criteria in the Dual High-Risk Population
**Supplementary Figure S2.** Prevalence of High Bleeding Risk Criteria in the Dual High-Risk Population
**Supplementary Figure S3A.** Combinations of High Ischemic Risk Criteria (UpSet Plot)
**Supplementary Figure S3B.** Combinations of High Bleeding Risk Criteria (UpSet Plot)
**Supplementary Figure S4.** Patterns of Missing Data Across Study Variables
**Supplementary Figure S5.** Convergence Diagnostics of Multiple Imputation by Chained Equations
**Supplementary Figure S6.** Distribution of Propensity Scores by Treatment Group
**Supplementary Figure S7.** Love Plot of Standardized Mean Differences Before and After Weighting
**Supplementary Figure S8.** Distribution of Propensity Score Weights by Weighting Method

**Supplementary Table 1. Baseline Characteristics: Dual High-Risk vs Non-Dual High-Risk Patients**

| **Characteristic** | **Overall (N=30,562)** | **Non-Dual High-Risk (n=8,550)** | **Dual High-Risk (n=22,012)** | **P value** |
| --- | --- | --- | --- | --- |
| ***Demographics*** |  |  |  |  |
| Age, years | 61.31 ± 10.43 | 53.55 ± 8.35 | 64.32 ± 9.56 | **<0.001** |
| Male sex | 22342 (73.11%) | 8175 (95.61%) | 14167 (64.36%) | **<0.001** |
| ***Comorbidities*** |  |  |  |  |
| Hypertension | 19053 (62.40%) | 4351 (50.97%) | 14702 (66.84%) | **<0.001** |
| Diabetes mellitus | 10250 (33.64%) | 441 (5.18%) | 9809 (44.67%) | **<0.001** |
| Anemia | 9745 (36.39%) | 254 (3.47%) | 9491 (48.75%) | **<0.001** |
| **Smoking status** |  |  |  | **<0.001** |
| Never | 14074 (46.15%) | 2809 (32.96%) | 11265 (51.26%) |  |
| Current | 12175 (39.92%) | 4596 (53.93%) | 7579 (34.49%) |  |
| Former | 4249 (13.93%) | 1117 (13.11%) | 3132 (14.25%) |  |
| Prior stroke | 3885 (12.74%) | 0 (0.00%) | 3885 (17.68%) | **<0.001** |
| Prior MI | 5146 (16.89%) | 1183 (13.88%) | 3963 (18.06%) | **<0.001** |
| Prior PCI | 7916 (25.94%) | 1697 (19.88%) | 6219 (28.29%) | **<0.001** |
| ***Laboratory values*** |  |  |  |  |
| eGFR, mL/min/1.73m² | 92.37 ± 25.27 | 99.70 ± 19.50 | 89.61 ± 26.62 | **<0.001** |
| Total cholesterol, mmol/L | 4.06 ± 1.17 | 4.10 ± 1.19 | 4.04 ± 1.16 | **<0.001** |
| Triglycerides, mmol/L | 1.69 ± 1.34 | 1.79 ± 1.49 | 1.65 ± 1.27 | **<0.001** |
| HDL-C, mmol/L | 1.09 ± 0.26 | 1.07 ± 0.25 | 1.10 ± 0.27 | **<0.001** |
| LDL-C, mmol/L | 2.33 ± 0.86 | 2.40 ± 0.89 | 2.30 ± 0.85 | **<0.001** |
| Hemoglobin, g/L | 139.55 ± 15.57 | 149.44 ± 11.07 | 135.83 ± 15.40 | **<0.001** |
| LVEF, % | 57.65 ± 8.69 | 58.66 ± 8.04 | 57.27 ± 8.90 | **<0.001** |
| ***Lesion characteristics*** |  |  |  |  |
| **No. of target vessels** |  |  |  | **<0.001** |
| 1 vessel | 22654 (74.29%) | 6779 (79.38%) | 15875 (72.30%) |  |
| 2 vessels | 7217 (23.67%) | 1645 (19.26%) | 5572 (25.38%) |  |
| 3 vessels | 625 (2.05%) | 116 (1.36%) | 509 (2.32%) |  |
| Multivessel disease | 6560 (21.46%) | 1504 (17.59%) | 5056 (22.97%) | **<0.001** |
| LM lesion | 1827 (5.98%) | 359 (4.20%) | 1468 (6.67%) | **<0.001** |
| LAD lesion | 16608 (54.34%) | 4868 (56.94%) | 11740 (53.33%) | **<0.001** |
| LCX lesion | 8404 (27.50%) | 2189 (25.60%) | 6215 (28.23%) | **<0.001** |
| RCA lesion | 11998 (39.26%) | 2956 (34.57%) | 9042 (41.08%) | **<0.001** |
| CTO lesion | 5389 (17.63%) | 1380 (16.14%) | 4009 (18.21%) | **<0.001** |
| Bifurcation lesion | 3393 (11.10%) | 839 (9.81%) | 2554 (11.60%) | **<0.001** |
| Calcified lesion | 5716 (18.70%) | 1209 (14.14%) | 4507 (20.48%) | **<0.001** |
| Thrombus-containing | 2055 (6.72%) | 620 (7.25%) | 1435 (6.52%) | 0.022 |
| ***Procedural characteristics*** |  |  |  |  |
| Number of stents | 1.79 ± 0.93 | 1.63 ± 0.88 | 1.85 ± 0.94 | **<0.001** |
| Total stent length, mm | 46.84 ± 27.51 | 42.27 ± 26.45 | 48.61 ± 27.70 | **<0.001** |
| Mean stent diameter, mm | 3.00 ± 0.38 | 3.07 ± 0.41 | 2.97 ± 0.37 | **<0.001** |
| ***Discharge medications*** |  |  |  |  |
| Aspirin | 29324 (95.95%) | 8265 (96.67%) | 21059 (95.67%) | **<0.001** |
| ACEI/ARB | 14357 (46.98%) | 3765 (44.04%) | 10592 (48.12%) | **<0.001** |
| Beta-blocker | 16841 (55.10%) | 4548 (53.19%) | 12293 (55.85%) | **<0.001** |
| Statin | 27548 (90.14%) | 7702 (90.08%) | 19846 (90.16%) | 0.837 |
| PPI | 9450 (30.92%) | 2651 (31.01%) | 6799 (30.89%) | 0.841 |

*Data are presented as mean ± SD or n (%). All values shown with 2 decimal places. Dual high-risk defined as meeting both high ischemic risk (HIR) and high bleeding risk (HBR) criteria per OPT-BIRISK framework.*

*Abbreviations: eGFR = estimated glomerular filtration rate; HDL-C = high-density lipoprotein cholesterol; LDL-C = low-density lipoprotein cholesterol; LVEF = left ventricular ejection fraction; LM = left main; LAD = left anterior descending; LCX = left circumflex; RCA = right coronary artery; CTO = chronic total occlusion; ACEI = angiotensin-converting enzyme inhibitor; ARB = angiotensin receptor blocker; PPI = proton pump inhibitor.*

**Supplementary Table 2. Clinical Outcomes: Dual High-Risk vs Non-Dual High-Risk Patients**

| **Outcome** | **Non-Dual High-Risk (n=8,550)** | **Dual High-Risk (n=22,012)** | **HR (95% CI)** | **P value** |
| --- | --- | --- | --- | --- |
| NACE | 213 (2.49%) | 1,091 (4.96%) | 2.04 (1.76-2.36) | <0.001 |
| Ischemic events | 97 (1.13%) | 658 (2.99%) | 2.66 (2.15-3.30) | <0.001 |
| All-cause death | 46 (0.54%) | 477 (2.17%) | 4.06 (3.00-5.50) | <0.001 |
| Cardiovascular death | 32 (0.37%) | 345 (1.57%) | 4.21 (2.93-6.05) | <0.001 |
| Myocardial infarction | 31 (0.36%) | 140 (0.64%) | 1.77 (1.20-2.62) | 0.004 |
| Stroke | 38 (0.44%) | 218 (0.99%) | 2.26 (1.60-3.18) | <0.001 |
| BARC 3-5 bleeding | 111 (1.30%) | 379 (1.72%) | 1.34 (1.08-1.66) | 0.007 |
| BARC 2-5 bleeding | 597 (6.98%) | 1,617 (7.35%) | 1.06 (0.96-1.16) | 0.228 |
| Any revascularization | 704 (8.24%) | 2,168 (9.86%) | 1.22 (1.12-1.33) | <0.001 |
| TVR | 143 (1.67%) | 477 (2.17%) | 1.31 (1.09-1.58) | 0.004 |

Data are presented as n (%). Ischemic events defined as the composite of cardiovascular death, myocardial infarction, and stroke. This analysis validates that the OPT-BIRISK criteria identify a population with genuinely elevated dual risk.

Abbreviations: HR = hazard ratio; CI = confidence interval; NACE = net adverse clinical events; TVR = target vessel revascularization; BARC = Bleeding Academic Research Consortium.

**Supplementary Table 3. Summary of Missing Data Before Multiple Imputation**

| **Variable** | **Missing, n** | **Missing, %** |
| --- | --- | --- |
| LVEF | 5,336 | 26.40% |
| Total cholesterol | 3,072 | 15.20% |
| Triglycerides | 3,072 | 15.20% |
| HDL-C | 3,072 | 15.20% |
| LDL-C | 3,072 | 15.20% |
| eGFR | 2,822 | 13.96% |
| Hemoglobin/Anemia | 2,276 | 11.26% |
| Smoking status | 3,016 | 14.92% |
| Hypertension | 11 | 0.05% |
| Diabetes mellitus | 45 | 0.22% |
| Sex | 1 | <0.01% |
| Age | 0 | 0.00% |
| Prior stroke | 0 | 0.00% |
| Prior MI | 0 | 0.00% |
| Prior PCI | 0 | 0.00% |

N = 20,213 patients in the analysis cohort. Multiple imputation by chained equations (MICE) was performed with m = 5 imputed datasets assuming data were missing at random (MAR). Continuous variables were imputed using predictive mean matching; binary variables using logistic regression; polytomous variables using multinomial logistic regression.

**Supplementary Table 4. Comparison of Baseline Characteristics Before and After Multiple Imputation**

|  | **Before Imputation** | | **After Imputation** | |  |
| --- | --- | --- | --- | --- | --- |
| **Characteristic** | **Clopidogrel** | **Ticagrelor** | **Clopidogrel** | **Ticagrelor** | **SMD*** |
| ***Demographics*** | | | | | |
| Age, years | 65.7 ± 9.5 | 60.5 ± 9.0 | 65.6 ± 9.5 | 60.8 ± 8.9 | 0.53 |
| Male sex | 61.3% | 73.2% | 61.4% | 72.2% | 0.23 |
| ***Comorbidities*** | | | | | |
| Hypertension | 68.0% | 62.1% | 68.0% | 63.7% | 0.09 |
| Diabetes mellitus | 43.6% | 47.8% | 43.7% | 47.2% | 0.07 |
| Anemia | 48.8% | 48.1% | 48.9% | 48.2% | 0.01 |
| Prior stroke | 16.7% | 11.0% | 16.6% | 11.0% | 0.16 |
| Prior MI | 17.0% | 18.9% | 17.0% | 18.9% | 0.05 |
| Prior PCI | 26.5% | 30.6% | 26.5% | 30.6% | 0.09 |
| ***Laboratory values*** | | | | | |
| eGFR, mL/min/1.73m² | 86.5 ± 27.3 | 95.5 ± 23.6 | 86.7 ± 27.1 | 95.2 ± 23.5 | 0.33 |
| Hemoglobin, g/L | 135.1 ± 16.7 | 141.5 ± 14.8 | 135.4 ± 16.5 | 141.3 ± 14.6 | 0.38 |
| LVEF, % | 57.0 ± 8.9 | 59.0 ± 7.1 | 57.2 ± 8.7 | 58.8 ± 7.2 | 0.20 |
| Total cholesterol, mmol/L | 3.97 ± 1.13 | 4.13 ± 1.16 | 3.98 ± 1.12 | 4.12 ± 1.15 | 0.12 |
| LDL-C, mmol/L | 2.25 ± 0.90 | 2.37 ± 0.89 | 2.26 ± 0.89 | 2.36 ± 0.88 | 0.11 |

Data are presented as mean ± SD or %. *SMD = standardized mean difference between treatment groups after imputation. Multiple imputation preserved the distributional characteristics of the original data while addressing missing values.

**Supplementary Table 5. Baseline Characteristics Before and After Inverse Probability Weighting (IPW)**

|  | **Before Weighting** | | | | **After Weighting** | | |
| --- | --- | --- | --- | --- | --- | --- | --- |
| **Characteristic** | **Clopidogrel** | **Ticagrelor** | **SMD** | **P value** | **Clopidogrel** | **Ticagrelor** | **SMD** |
| **N** | **15,650** | **4,563** |  |  | **15,650** | **4,563** |  |
| ***Demographics*** |  |  |  |  |  |  |  |
| Age, years | 65.71 ± 9.46 | 60.53 ± 9.03 | 0.56 | **<0.001** | 64.43 ± 9.99 | 63.74 ± 8.25 | 0.08 |
| Male sex | 9589 (61.27%) | 3340 (73.20%) | 0.26 | **<0.001** | 10025 (64.06%) | 2963 (64.94%) | 0.02 |
| ***Comorbidities*** |  |  |  |  |  |  |  |
| Hypertension | 10640 (67.99%) | 2835 (62.13%) | 0.12 | **<0.001** | 10446 (66.75%) | 3088 (67.67%) | 0.02 |
| Diabetes mellitus | 6824 (43.60%) | 2180 (47.78%) | 0.08 | **<0.001** | 6983 (44.62%) | 2066 (45.29%) | 0.01 |
| Anemia | 7656 (48.92%) | 2186 (47.91%) | 0.02 | 0.235 | 7610 (48.63%) | 2206 (48.35%) | 0.01 |
| **Smoking status** |  |  | 0.16 | **<0.001** |  |  | 0.01 |
| Never | 8422 (53.81%) | 2028 (44.44%) |  |  | 8089 (51.68%) | 2321 (50.87%) |  |
| Current | 5109 (32.65%) | 1838 (40.28%) |  |  | 5380 (34.38%) | 1614 (35.37%) |  |
| Former | 2119 (13.54%) | 697 (15.28%) |  |  | 2182 (13.94%) | 628 (13.76%) |  |
| Prior stroke | 2906 (18.57%) | 618 (13.54%) | 0.14 | **<0.001** | 2729 (17.43%) | 753 (16.50%) | 0.02 |
| Prior MI | 2701 (17.26%) | 995 (21.81%) | 0.11 | **<0.001** | 2869 (18.34%) | 819 (17.95%) | 0.01 |
| Prior PCI | 4280 (27.35%) | 1531 (33.55%) | 0.14 | **<0.001** | 4501 (28.76%) | 1297 (28.42%) | 0.01 |
| ***Laboratory values*** |  |  |  |  |  |  |  |
| eGFR, mL/min/1.73m² | 88.18 ± 26.83 | 92.66 ± 25.05 | 0.17 | **<0.001** | 89.25 ± 27.16 | 89.60 ± 24.99 | 0.01 |
| Total cholesterol, mmol/L | 4.05 ± 1.13 | 3.99 ± 1.20 | 0.05 | 0.004 | 4.04 ± 1.13 | 4.03 ± 1.18 | <0.01 |
| Triglycerides, mmol/L | 1.62 ± 1.23 | 1.70 ± 1.29 | 0.06 | **<0.001** | 1.64 ± 1.30 | 1.65 ± 1.14 | <0.01 |
| HDL-C, mmol/L | 1.09 ± 0.27 | 1.10 ± 0.27 | 0.02 | 0.176 | 1.10 ± 0.27 | 1.09 ± 0.26 | 0.03 |
| LDL-C, mmol/L | 2.32 ± 0.84 | 2.26 ± 0.87 | 0.07 | **<0.001** | 2.30 ± 0.83 | 2.31 ± 0.87 | 0.01 |
| Hemoglobin, g/L | 134.98 ± 15.70 | 137.91 ± 14.41 | 0.19 | **<0.001** | 135.69 ± 15.74 | 136.12 ± 14.50 | 0.03 |
| LVEF, % | 57.45 ± 8.89 | 57.08 ± 8.85 | 0.04 | 0.012 | 57.36 ± 8.93 | 57.39 ± 8.65 | <0.01 |
| ***Lesion characteristics*** |  |  |  |  |  |  |  |
| **No. of target vessels** |  |  | 0.05 | 0.288 |  |  | 0.02 |
| 1 vessel | 11334 (72.42%) | 3315 (72.65%) |  |  | 11358 (72.57%) | 3255 (71.33%) |  |
| 2 vessels | 3938 (25.16%) | 1156 (25.33%) |  |  | 3927 (25.10%) | 1201 (26.32%) |  |
| 3 vessels | 378 (2.42%) | 92 (2.02%) |  |  | 365 (2.33%) | 107 (2.35%) |  |
| Multivessel disease | 3673 (23.47%) | 983 (21.54%) | 0.05 | 0.007 | 3599 (23.00%) | 1105 (24.21%) | 0.03 |
| LM lesion | 949 (6.06%) | 362 (7.93%) | 0.07 | **<0.001** | 1009 (6.45%) | 290 (6.35%) | <0.01 |
| LAD lesion | 8365 (53.45%) | 2373 (52.01%) | 0.03 | 0.088 | 8316 (53.14%) | 2467 (54.06%) | 0.02 |
| LCX lesion | 4395 (28.08%) | 1298 (28.45%) | 0.01 | 0.645 | 4403 (28.13%) | 1237 (27.11%) | 0.02 |
| RCA lesion | 6565 (41.95%) | 1814 (39.75%) | 0.04 | 0.009 | 6485 (41.44%) | 1951 (42.76%) | 0.03 |
| CTO lesion | 2848 (18.20%) | 845 (18.52%) | 0.01 | 0.638 | 2863 (18.29%) | 817 (17.91%) | 0.01 |
| Bifurcation lesion | 1701 (10.87%) | 579 (12.69%) | 0.06 | **<0.001** | 1762 (11.26%) | 499 (10.94%) | 0.01 |
| Calcified lesion | 3234 (20.66%) | 853 (18.69%) | 0.05 | 0.004 | 3155 (20.16%) | 885 (19.38%) | 0.02 |
| Thrombus-containing | 970 (6.20%) | 363 (7.96%) | 0.07 | **<0.001** | 1039 (6.64%) | 350 (7.66%) | 0.04 |
| ***Procedural characteristics*** |  |  |  |  |  |  |  |
| Number of stents | 1.82 ± 0.94 | 1.89 ± 0.97 | 0.07 | **<0.001** | 1.84 ± 0.95 | 1.85 ± 0.93 | 0.02 |
| Total stent length, mm | 47.66 ± 27.23 | 50.42 ± 28.66 | 0.10 | **<0.001** | 48.28 ± 27.64 | 48.58 ± 26.86 | 0.01 |
| Mean stent diameter, mm | 2.96 ± 0.37 | 2.98 ± 0.37 | 0.03 | 0.072 | 2.97 ± 0.37 | 2.96 ± 0.36 | 0.01 |
| ***Discharge medications*** |  |  |  |  |  |  |  |
| Aspirin | 14792 (94.52%) | 4545 (99.61%) | 0.30 | **<0.001** | 14973 (95.68%) | 4337 (95.04%) | 0.03 |
| ACEI/ARB | 7147 (45.67%) | 2374 (52.03%) | 0.13 | **<0.001** | 7388 (47.21%) | 2160 (47.33%) | <0.01 |
| Beta-blocker | 8252 (52.73%) | 2860 (62.68%) | 0.20 | **<0.001** | 8618 (55.06%) | 2504 (54.88%) | <0.01 |
| Statin | 13950 (89.14%) | 4239 (92.90%) | 0.13 | **<0.001** | 14087 (90.02%) | 4084 (89.49%) | 0.02 |
| PPI | 4829 (30.86%) | 1301 (28.51%) | 0.05 | 0.003 | 4742 (30.30%) | 1326 (29.06%) | 0.03 |

*Data are presented as mean ± SD or n (%). All values shown with 2 decimal places. SMD = standardized mean difference.*

*Abbreviations: eGFR = estimated glomerular filtration rate; HDL-C = high-density lipoprotein cholesterol; LDL-C = low-density lipoprotein cholesterol; LVEF = left ventricular ejection fraction; LM = left main; LAD = left anterior descending; LCX = left circumflex; RCA = right coronary artery; CTO = chronic total occlusion; ACEI = angiotensin-converting enzyme inhibitor; ARB = angiotensin receptor blocker; PPI = proton pump inhibitor.*

**Supplementary Table 6. Baseline Characteristics Before and After ATT Weighting**

|  | **Before Weighting** | | | | **After Weighting** | | |
| --- | --- | --- | --- | --- | --- | --- | --- |
| **Characteristic** | **Clopidogrel** | **Ticagrelor** | **SMD** | **P value** | **Clopidogrel** | **Ticagrelor** | **SMD** |
| **N** | **15,650** | **4,563** |  |  | **15,650** | **4,563** |  |
| ***Demographics*** |  |  |  |  |  |  |  |
| Age, years | 65.71 ± 9.46 | 60.53 ± 9.03 | 0.56 | **<0.001** | 60.10 ± 10.52 | 60.53 ± 9.02 | 0.04 |
| Male sex | 9589 (61.27%) | 3340 (73.20%) | 0.26 | **<0.001** | 11503 (73.50%) | 3340 (73.20%) | 0.01 |
| ***Comorbidities*** |  |  |  |  |  |  |  |
| Hypertension | 10640 (67.99%) | 2835 (62.13%) | 0.12 | **<0.001** | 9787 (62.54%) | 2835 (62.13%) | 0.01 |
| Diabetes mellitus | 6824 (43.60%) | 2180 (47.78%) | 0.08 | **<0.001** | 7524 (48.08%) | 2180 (47.78%) | 0.01 |
| Anemia | 7656 (48.92%) | 2186 (47.91%) | 0.02 | 0.235 | 7455 (47.64%) | 2186 (47.91%) | 0.01 |
| **Smoking status** |  |  | 0.16 | **<0.001** |  |  | <0.01 |
| Never | 8422 (53.81%) | 2028 (44.44%) |  |  | 6958 (44.46%) | 2028 (44.44%) |  |
| Current | 5109 (32.65%) | 1838 (40.28%) |  |  | 6298 (40.24%) | 1838 (40.28%) |  |
| Former | 2119 (13.54%) | 697 (15.28%) |  |  | 2394 (15.30%) | 697 (15.28%) |  |
| Prior stroke | 2906 (18.57%) | 618 (13.54%) | 0.14 | **<0.001** | 2126 (13.59%) | 618 (13.54%) | <0.01 |
| Prior MI | 2701 (17.26%) | 995 (21.81%) | 0.11 | **<0.001** | 3441 (21.99%) | 995 (21.81%) | <0.01 |
| Prior PCI | 4280 (27.35%) | 1531 (33.55%) | 0.14 | **<0.001** | 5251 (33.55%) | 1531 (33.55%) | <0.01 |
| ***Laboratory values*** |  |  |  |  |  |  |  |
| eGFR, mL/min/1.73m² | 88.18 ± 26.83 | 92.66 ± 25.05 | 0.17 | **<0.001** | 92.87 ± 27.95 | 92.66 ± 25.05 | 0.01 |
| Total cholesterol, mmol/L | 4.05 ± 1.13 | 3.99 ± 1.20 | 0.05 | 0.004 | 4.00 ± 1.15 | 3.99 ± 1.20 | <0.01 |
| Triglycerides, mmol/L | 1.62 ± 1.23 | 1.70 ± 1.29 | 0.06 | **<0.001** | 1.73 ± 1.52 | 1.70 ± 1.29 | <0.01 |
| HDL-C, mmol/L | 1.09 ± 0.27 | 1.10 ± 0.27 | 0.02 | 0.176 | 1.10 ± 0.29 | 1.10 ± 0.27 | <0.01 |
| LDL-C, mmol/L | 2.32 ± 0.84 | 2.26 ± 0.87 | 0.07 | **<0.001** | 2.26 ± 0.83 | 2.26 ± 0.87 | <0.01 |
| Hemoglobin, g/L | 134.98 ± 15.70 | 137.91 ± 14.41 | 0.19 | **<0.001** | 138.12 ± 15.61 | 137.91 ± 14.41 | 0.01 |
| LVEF, % | 57.45 ± 8.89 | 57.08 ± 8.85 | 0.04 | 0.012 | 57.04 ± 9.06 | 57.08 ± 8.84 | <0.01 |
| ***Lesion characteristics*** |  |  |  |  |  |  |  |
| **No. of target vessels** |  |  | 0.05 | 0.288 |  |  | <0.01 |
| 1 vessel | 11334 (72.42%) | 3315 (72.65%) |  |  | 11439 (73.09%) | 3315 (72.65%) |  |
| 2 vessels | 3938 (25.16%) | 1156 (25.33%) |  |  | 3892 (24.87%) | 1156 (25.33%) |  |
| 3 vessels | 378 (2.42%) | 92 (2.02%) |  |  | 320 (2.04%) | 92 (2.02%) |  |
| Multivessel disease | 3673 (23.47%) | 983 (21.54%) | 0.05 | 0.007 | 3347 (21.39%) | 983 (21.54%) | <0.01 |
| LM lesion | 949 (6.06%) | 362 (7.93%) | 0.07 | **<0.001** | 1215 (7.76%) | 362 (7.93%) | 0.01 |
| LAD lesion | 8365 (53.45%) | 2373 (52.01%) | 0.03 | 0.088 | 8150 (52.07%) | 2373 (52.01%) | <0.01 |
| LCX lesion | 4395 (28.08%) | 1298 (28.45%) | 0.01 | 0.645 | 4428 (28.30%) | 1298 (28.45%) | <0.01 |
| RCA lesion | 6565 (41.95%) | 1814 (39.75%) | 0.04 | 0.009 | 6214 (39.71%) | 1814 (39.75%) | <0.01 |
| CTO lesion | 2848 (18.20%) | 845 (18.52%) | 0.01 | 0.638 | 2913 (18.61%) | 845 (18.52%) | <0.01 |
| Bifurcation lesion | 1701 (10.87%) | 579 (12.69%) | 0.06 | **<0.001** | 1967 (12.57%) | 579 (12.69%) | <0.01 |
| Calcified lesion | 3234 (20.66%) | 853 (18.69%) | 0.05 | 0.004 | 2886 (18.44%) | 853 (18.69%) | 0.01 |
| Thrombus-containing | 970 (6.20%) | 363 (7.96%) | 0.07 | **<0.001** | 1272 (8.13%) | 363 (7.96%) | 0.01 |
| ***Procedural characteristics*** |  |  |  |  |  |  |  |
| Number of stents | 1.82 ± 0.94 | 1.89 ± 0.97 | 0.07 | **<0.001** | 1.89 ± 0.98 | 1.89 ± 0.97 | <0.01 |
| Total stent length, mm | 47.66 ± 27.23 | 50.42 ± 28.66 | 0.10 | **<0.001** | 50.35 ± 28.92 | 50.42 ± 28.66 | <0.01 |
| Mean stent diameter, mm | 2.96 ± 0.37 | 2.98 ± 0.37 | 0.03 | 0.072 | 2.98 ± 0.37 | 2.98 ± 0.37 | <0.01 |
| ***Discharge medications*** |  |  |  |  |  |  |  |
| Aspirin | 14792 (94.52%) | 4545 (99.61%) | 0.30 | **<0.001** | 15588 (99.61%) | 4545 (99.61%) | <0.01 |
| ACEI/ARB | 7147 (45.67%) | 2374 (52.03%) | 0.13 | **<0.001** | 8204 (52.42%) | 2374 (52.03%) | 0.01 |
| Beta-blocker | 8252 (52.73%) | 2860 (62.68%) | 0.20 | **<0.001** | 9858 (62.99%) | 2860 (62.68%) | 0.01 |
| Statin | 13950 (89.14%) | 4239 (92.90%) | 0.13 | **<0.001** | 14554 (93.00%) | 4239 (92.90%) | <0.01 |
| PPI | 4829 (30.86%) | 1301 (28.51%) | 0.05 | 0.003 | 4448 (28.42%) | 1301 (28.51%) | <0.01 |

*Data are presented as mean ± SD or n (%). All values shown with 2 decimal places. SMD = standardized mean difference.*

*Abbreviations: eGFR = estimated glomerular filtration rate; HDL-C = high-density lipoprotein cholesterol; LDL-C = low-density lipoprotein cholesterol; LVEF = left ventricular ejection fraction; LM = left main; LAD = left anterior descending; LCX = left circumflex; RCA = right coronary artery; CTO = chronic total occlusion; ACEI = angiotensin-converting enzyme inhibitor; ARB = angiotensin receptor blocker; PPI = proton pump inhibitor.*

**Supplementary Table 7. Sensitivity Analysis: Clinical Outcomes by Different Weighting Methods**

|  | **Overlap Weighting** | | | | **Inverse Probability Weighting** | | | | **ATT Weighting** | | | |
| --- | --- | --- | --- | --- | --- | --- | --- | --- | --- | --- | --- | --- |
| **Outcome** | **Clop** | **Tica** | **HR (95% CI)** | **P** | **Clop** | **Tica** | **HR (95% CI)** | **P** | **Clop** | **Tica** | **HR (95% CI)** | **P** |
| NACE | 718 (4.59%) | 217 (4.75%) | 1.05 (0.89-1.23) | 0.568 | 787 (5.03%) | 215 (4.72%) | 0.94 (0.80-1.12) | 0.508 | 688 (4.39%) | 209 (4.58%) | 1.05 (0.89-1.24) | 0.539 |
| Ischemic events | 439 (2.80%) | 113 (2.48%) | 0.90 (0.72-1.12) | 0.333 | 493 (3.15%) | 113 (2.49%) | 0.80 (0.63-1.00) | 0.050 | 418 (2.67%) | 108 (2.37%) | 0.90 (0.72-1.12) | 0.340 |
| All-cause death | 307 (1.96%) | 69 (1.51%) | 0.78 (0.59-1.02) | 0.072 | 371 (2.37%) | 71 (1.56%) | 0.66 (0.49-0.88) | 0.005 | 288 (1.84%) | 65 (1.42%) | 0.78 (0.59-1.03) | 0.083 |
| CV death | 219 (1.40%) | 52 (1.14%) | 0.83 (0.60-1.14) | 0.252 | 262 (1.68%) | 52 (1.14%) | 0.69 (0.50-0.96) | 0.027 | 209 (1.33%) | 50 (1.10%) | 0.83 (0.60-1.15) | 0.266 |
| MI | 103 (0.66%) | 28 (0.62%) | 0.94 (0.60-1.46) | 0.785 | 100 (0.64%) | 27 (0.60%) | 0.93 (0.59-1.48) | 0.768 | 107 (0.68%) | 28 (0.61%) | 0.90 (0.57-1.41) | 0.632 |
| Stroke | 153 (0.98%) | 40 (0.87%) | 0.90 (0.63-1.30) | 0.587 | 166 (1.06%) | 40 (0.89%) | 0.84 (0.57-1.24) | 0.384 | 143 (0.91%) | 37 (0.81%) | 0.91 (0.62-1.32) | 0.604 |
| BARC 3-5 | 248 (1.58%) | 100 (2.19%) | 1.39 (1.08-1.77) | 0.009 | 246 (1.57%) | 94 (2.05%) | 1.30 (1.01-1.68) | 0.042 | 244 (1.56%) | 99 (2.17%) | 1.39 (1.08-1.79) | 0.010 |
| BARC 2-5 | 951 (6.07%) | 468 (10.26%) | 1.74 (1.54-1.96) | <0.001 | 967 (6.18%) | 474 (10.39%) | 1.73 (1.53-1.97) | <0.001 | 939 (6.00%) | 456 (9.99%) | 1.71 (1.51-1.94) | <0.001 |

Weighted event counts and percentages shown for each propensity score method. IPW = inverse probability weighting; ATT = average treatment effect on the treated. Results are consistent across methods, with bleeding risk significantly elevated with ticagrelor regardless of weighting approach.
