# Supplementary material
Source: Research Square preprint supplement (doi:10.21203/rs.3.rs-9230830/v1)
Supplement: Supplementary file 6 [file 8edab57916dd76859b948653.pdf]

# High Bleeding Risk Criteria Combinations (N = 22,012)

Intersection Size

3000  
2000  
1000  
0

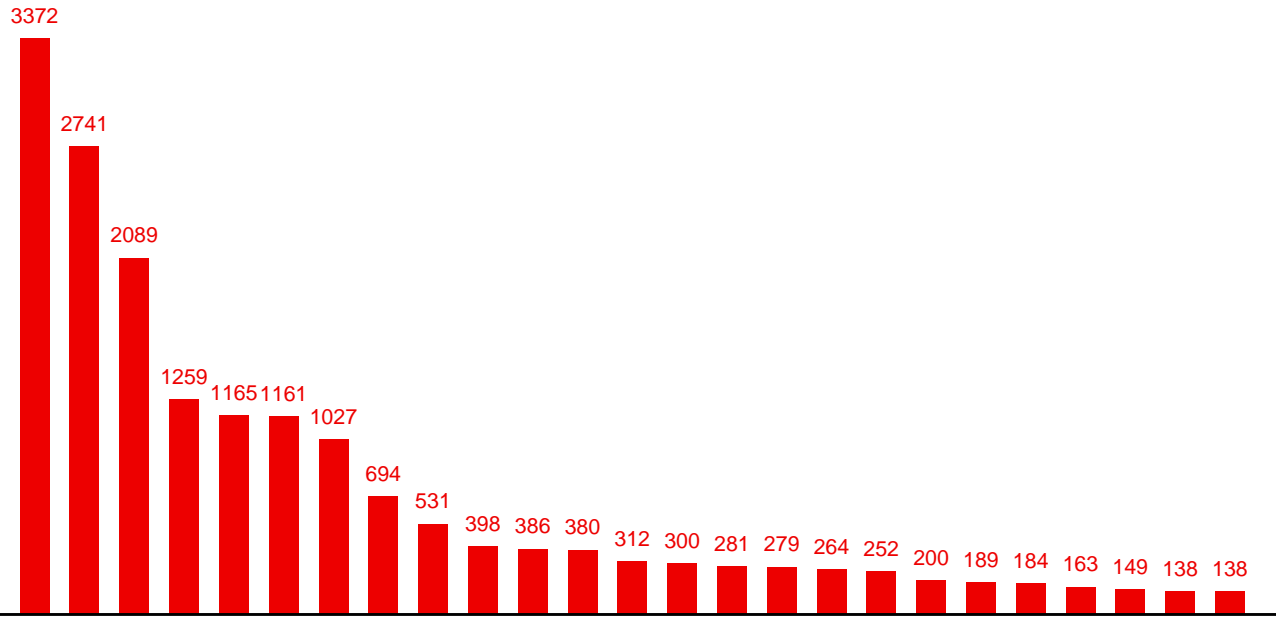

- eGFR <60
- Age >=75
- Prior Stroke
- Female
- DM
- Anemia

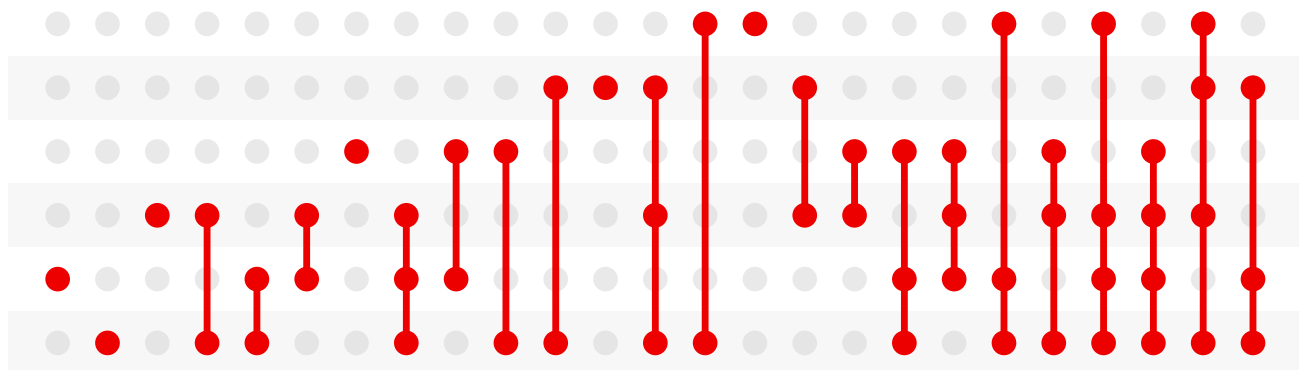

7500 5000 2500 0  
Patients per Criterion
