# Supplementary material
Source: Research Square preprint supplement (doi:10.21203/rs.3.rs-9230830/v1)

# Propensity Score Distribution

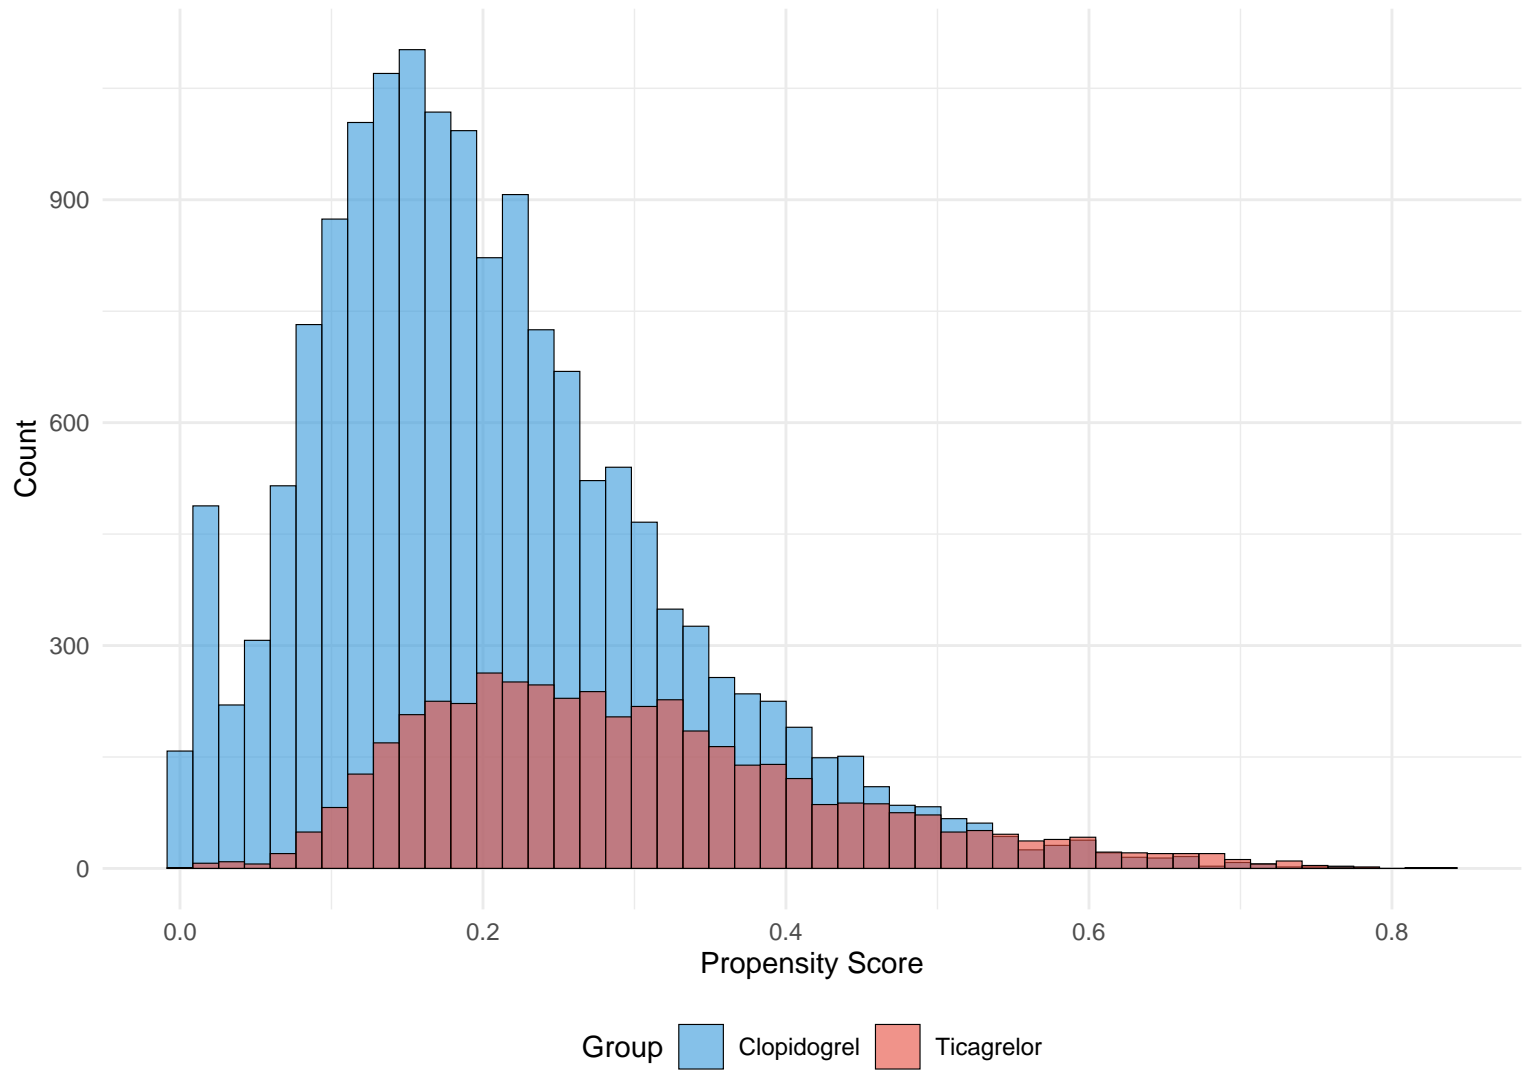

Supplement: Supplementary file 1 [file 30ecd0a6e3c871cce3e813c0.pdf]

# Prevalence of High Bleeding Risk Criteria

High IR/High BR Population (N = 22,012)

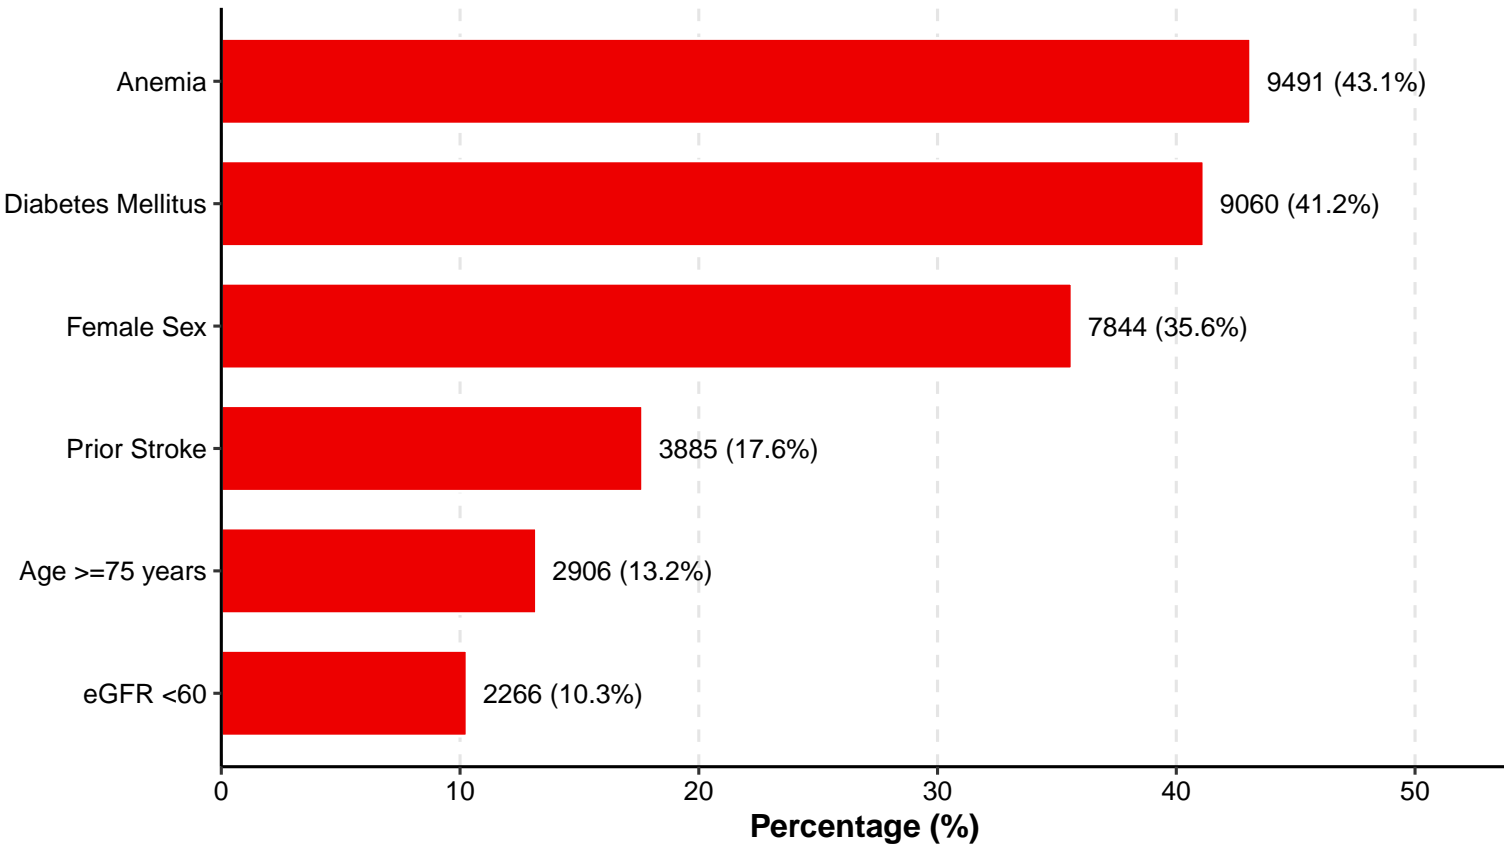

Supplement: Supplementary file 3 [file 5e8c3e66b2936f7331803a1a.pdf]

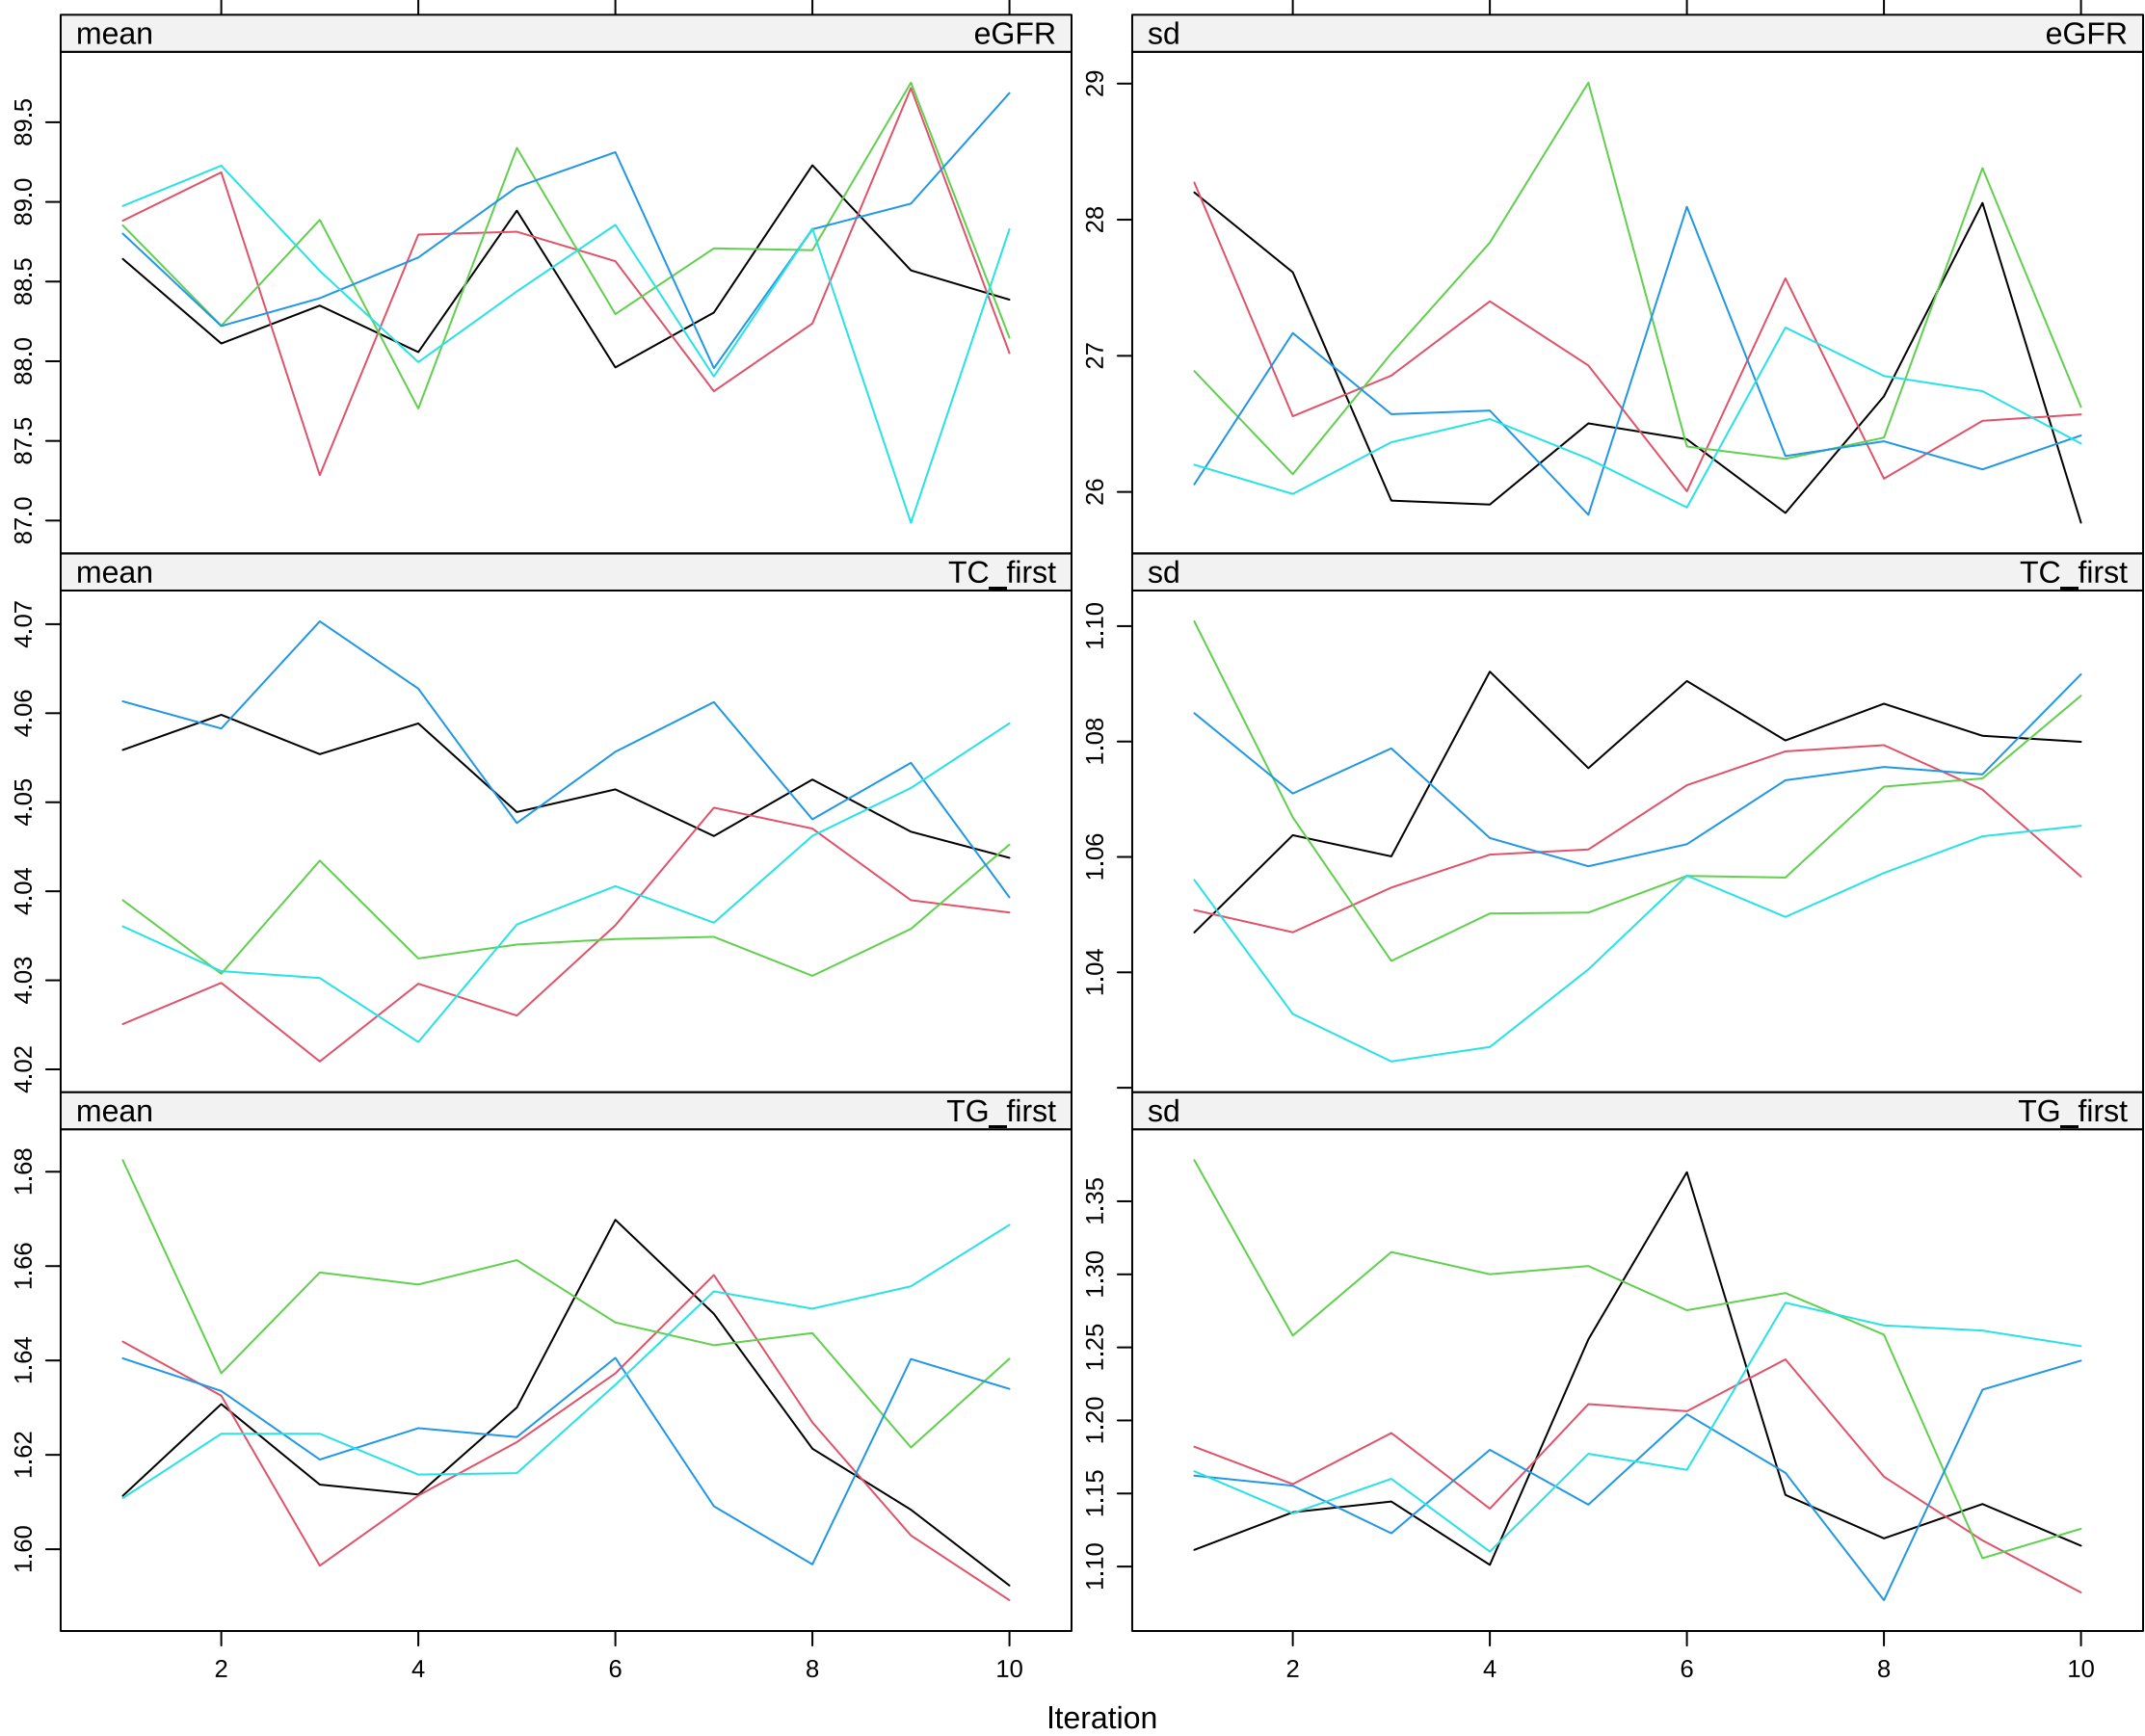

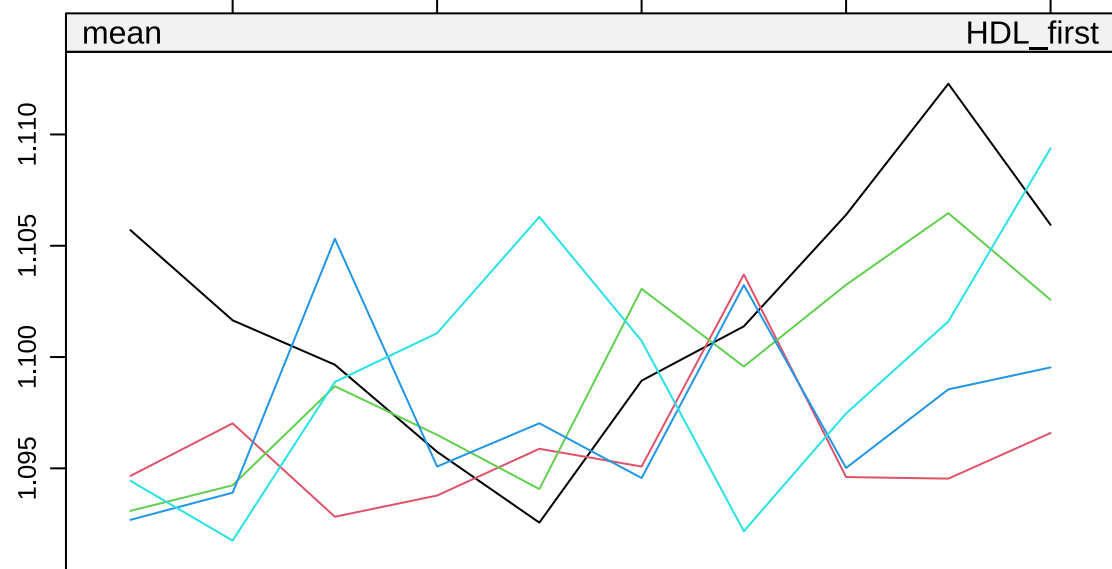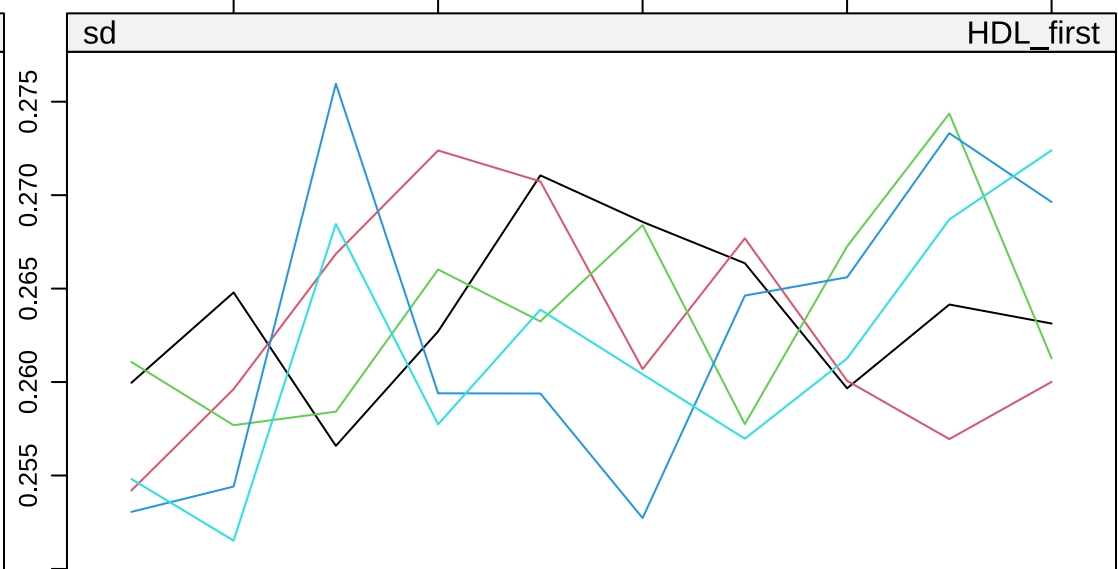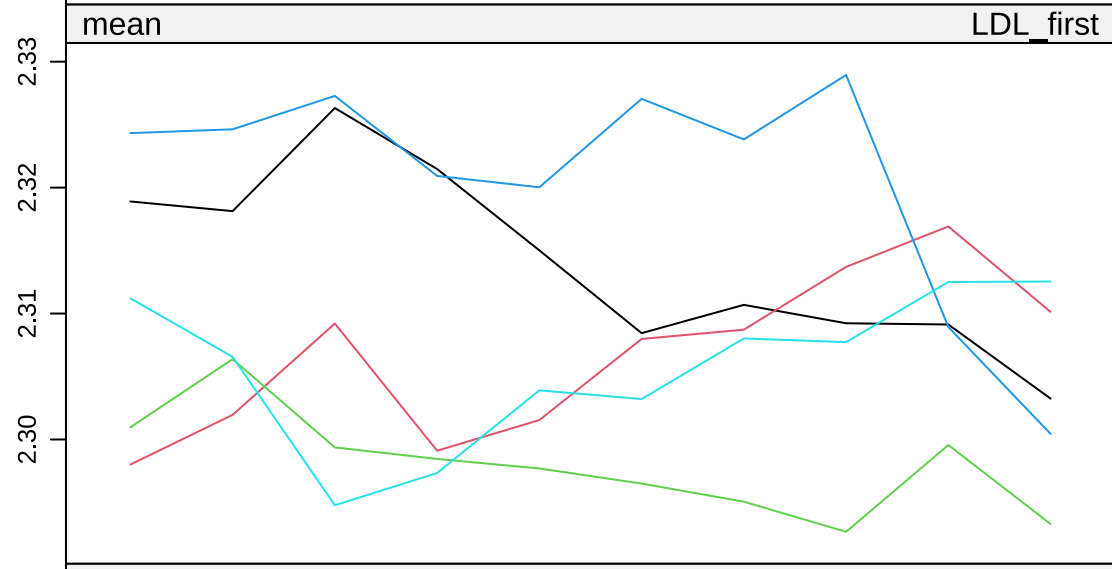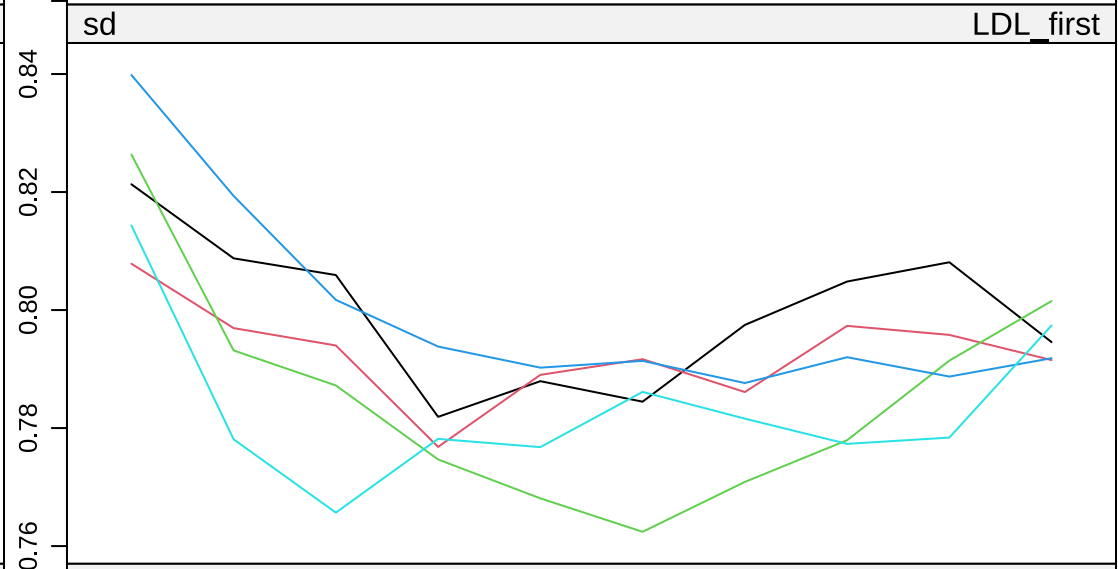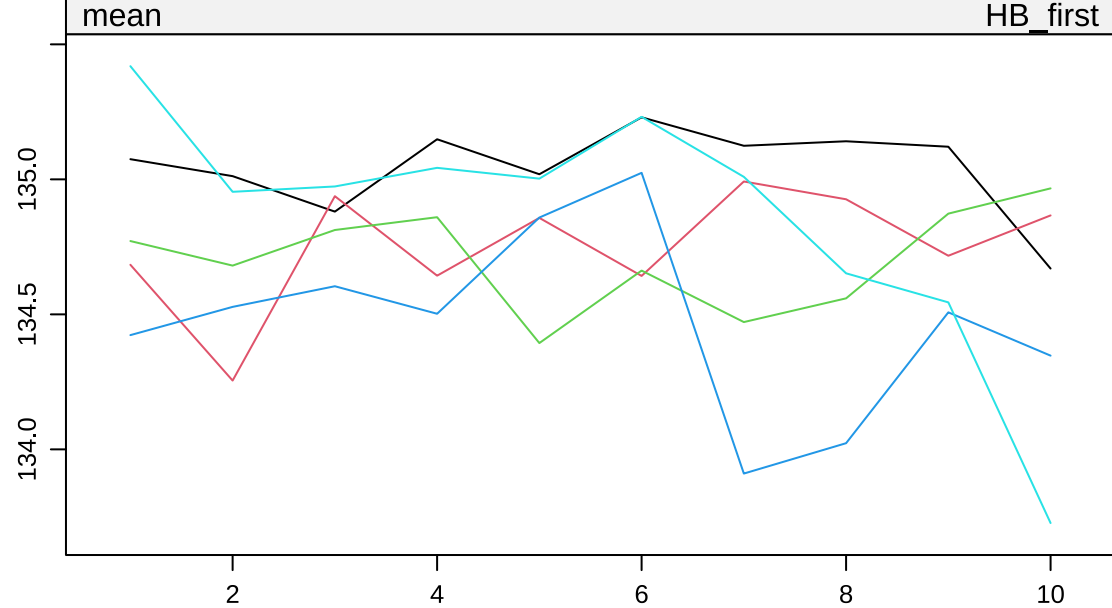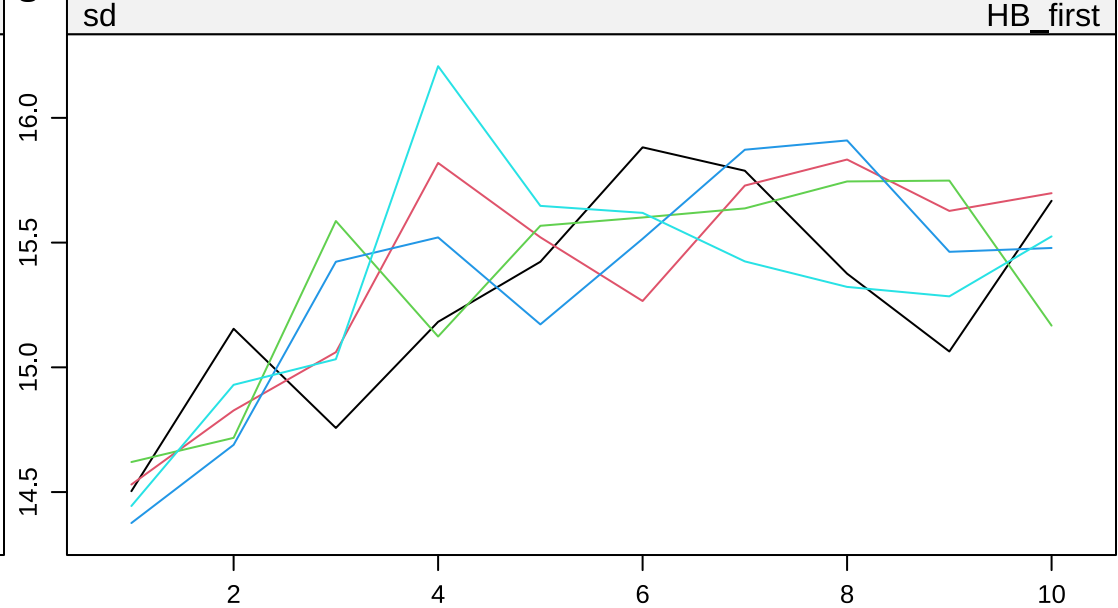

Iteration

Supplement: Supplementary file 4 [file 6e04dfcea6e0a23c5e42b07f.pdf]

# Missing Data by Variable

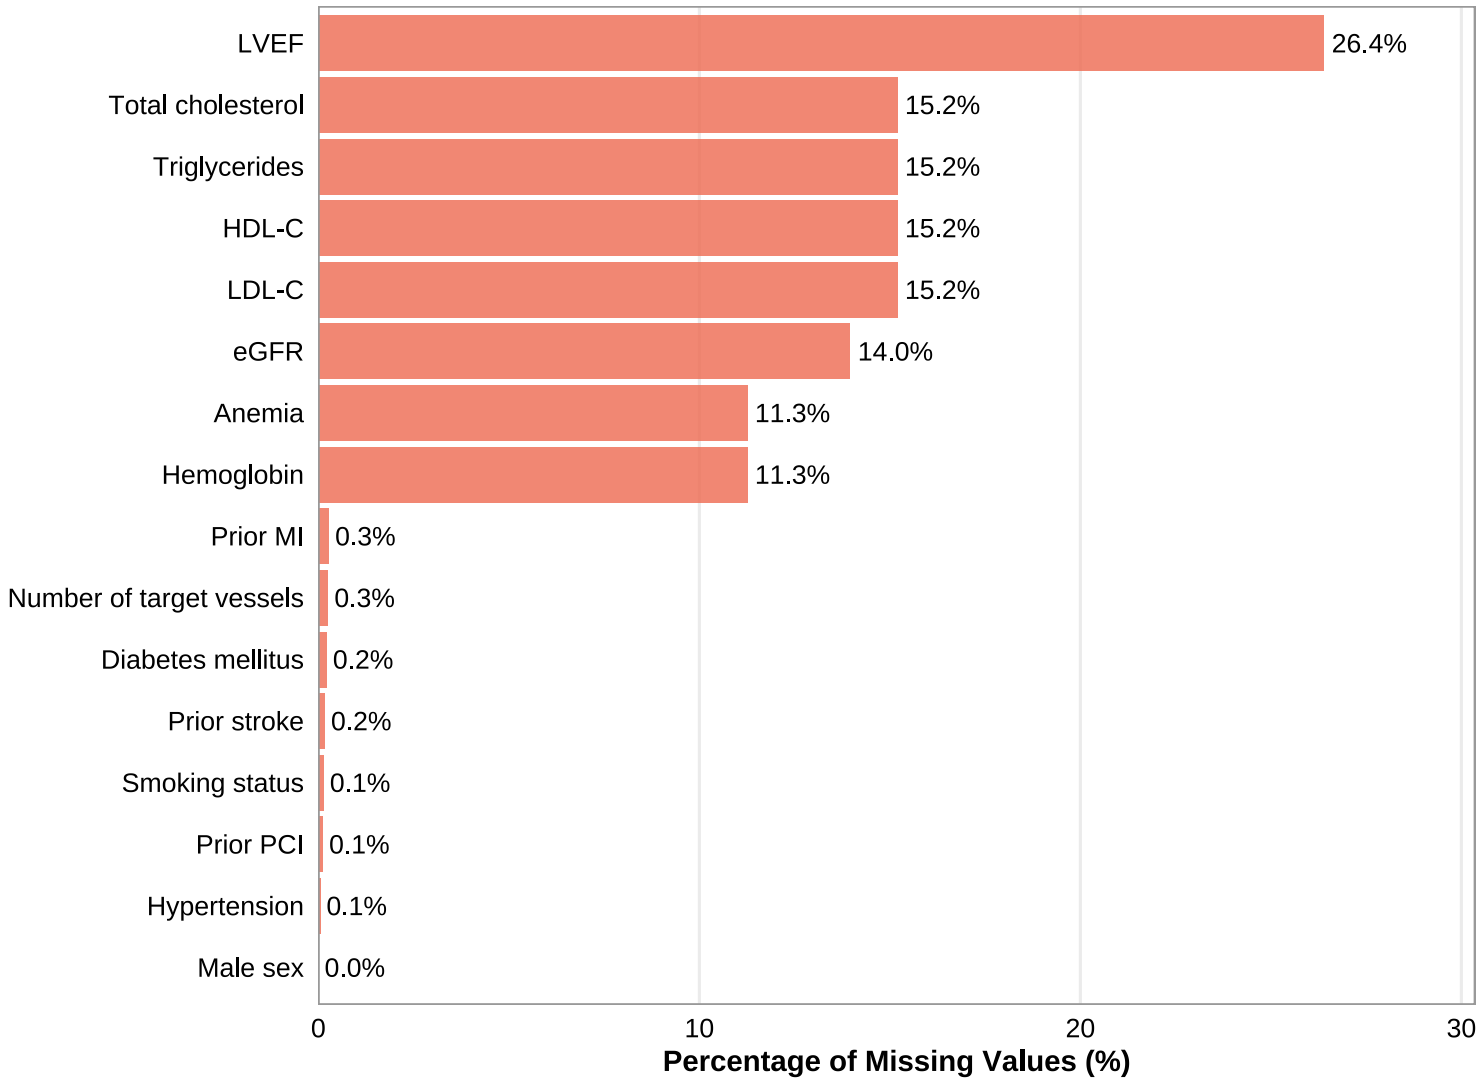

Supplement: Supplementary file 7 [file c3299ad1beba290fd7306223.pdf]

# Prevalence of High Ischemic Risk Criteria

High IR/High BR Population (N = 22,012)

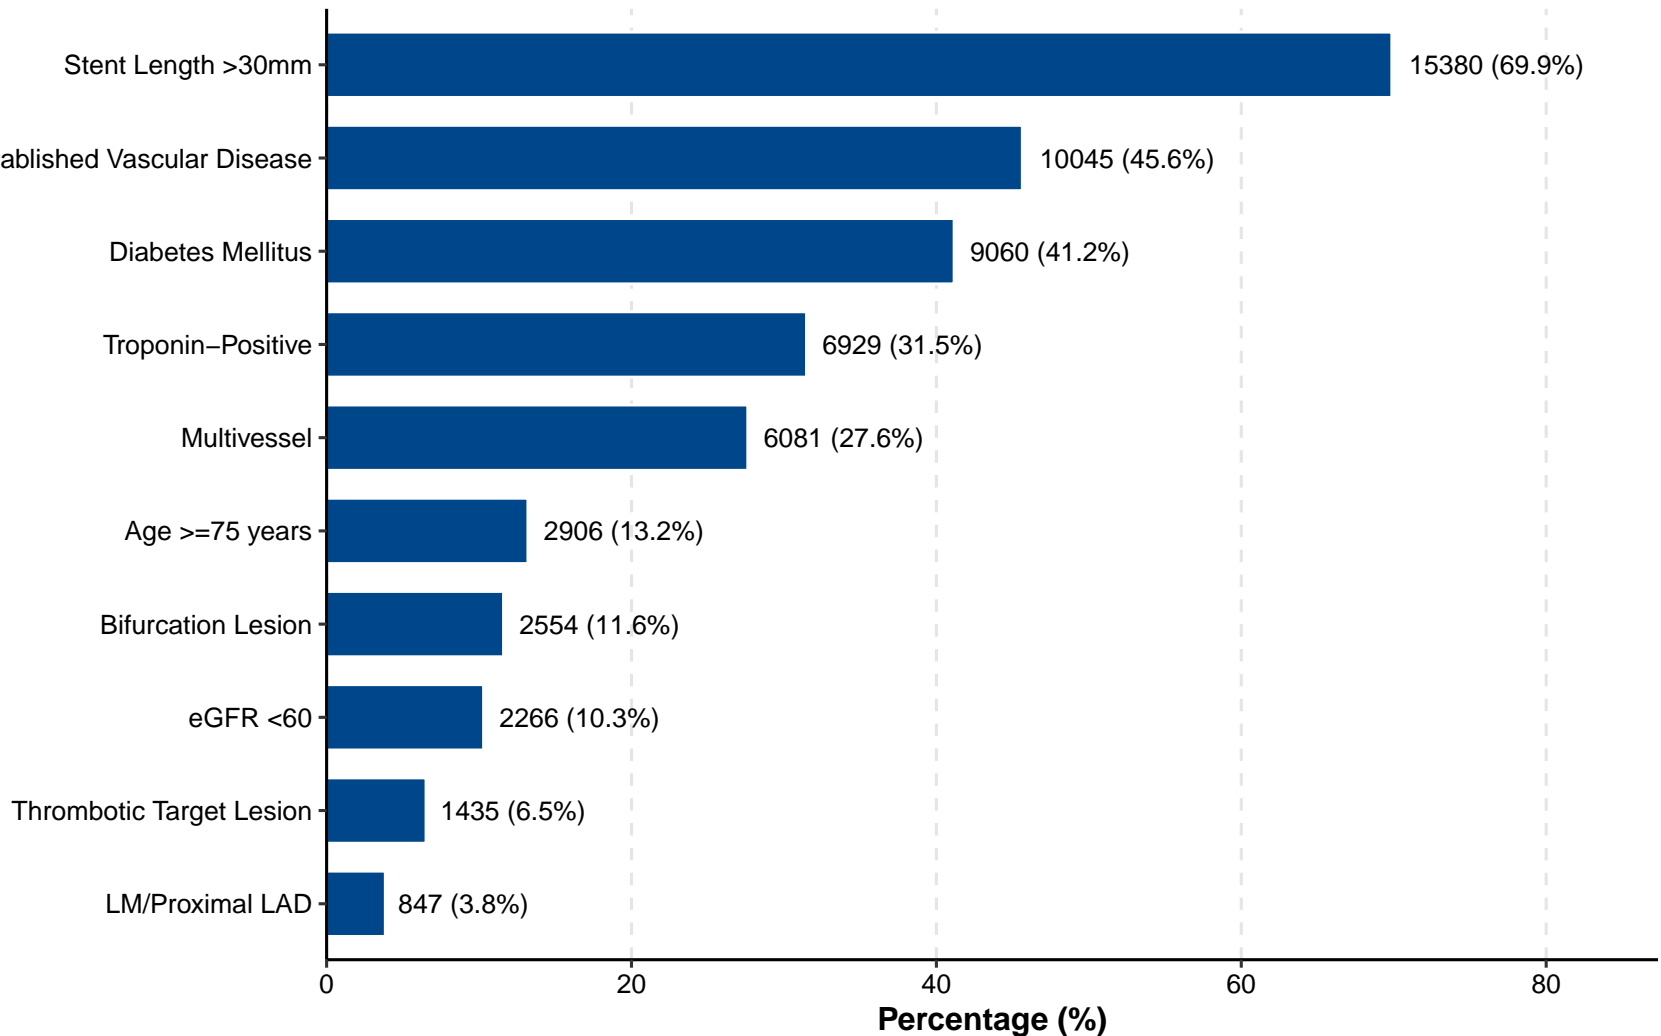

Supplement: Supplementary file 8 [file d9c58d1e35a500c08b8b95da.pdf]

# High Ischemic Risk Criteria Combinations (N = 22,012)

Intersection Size

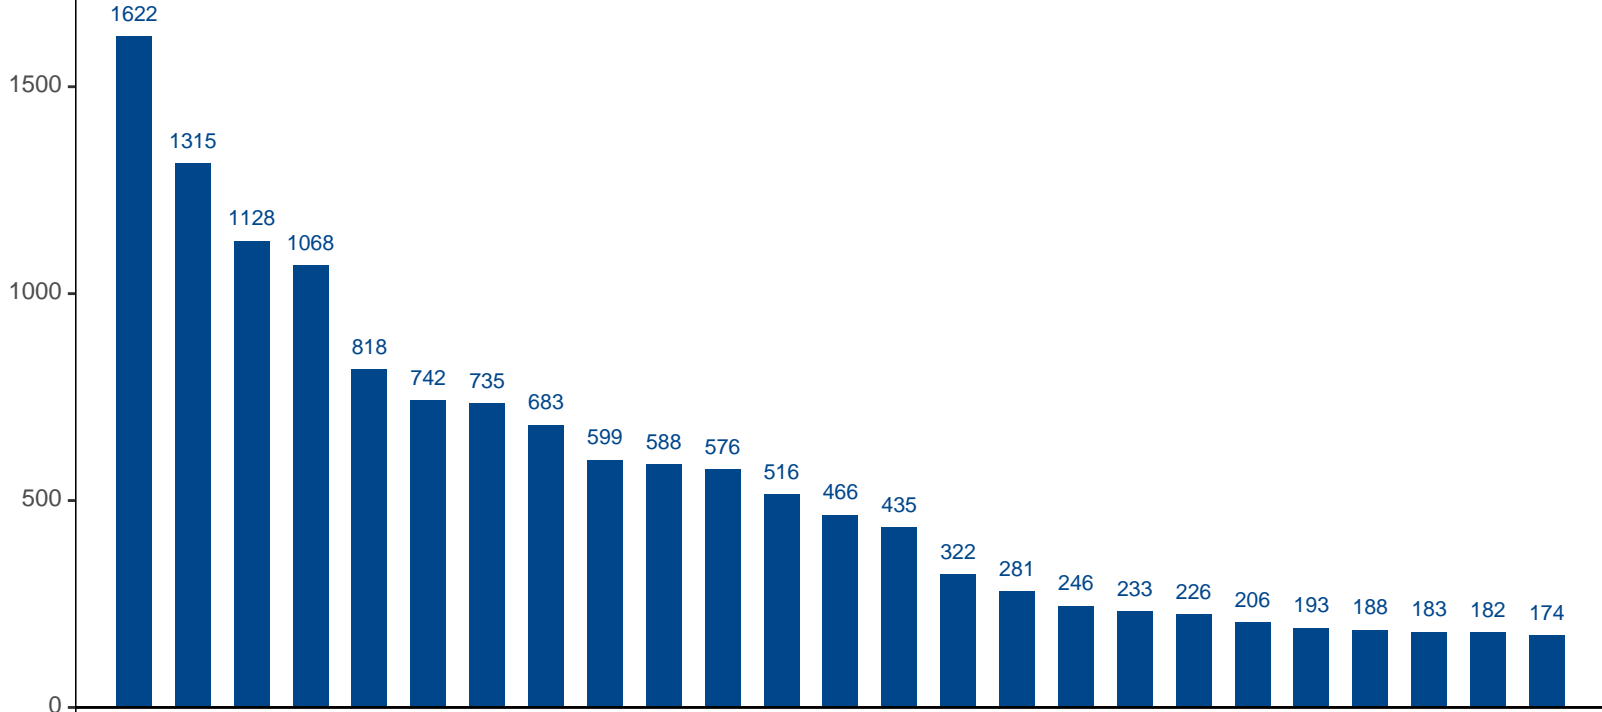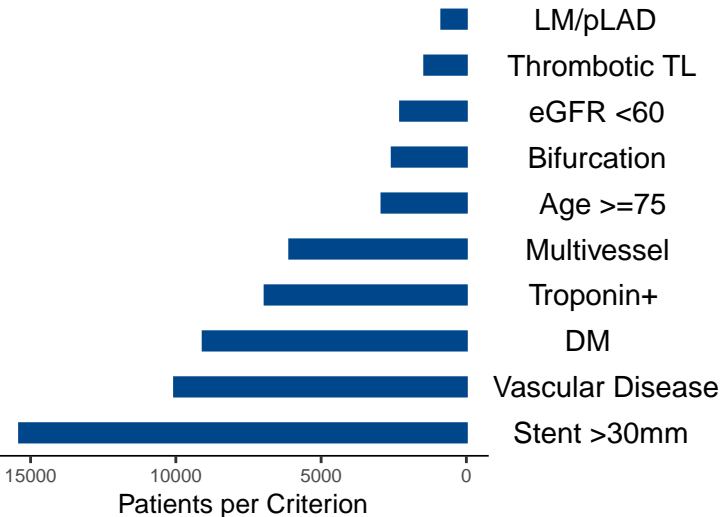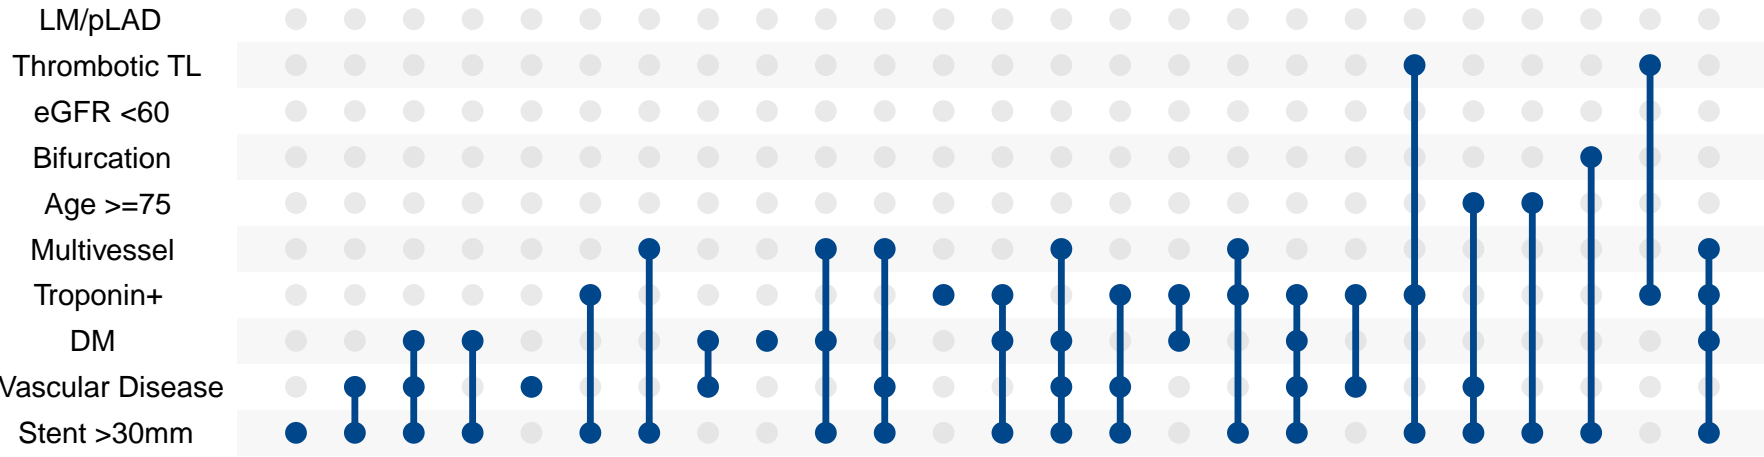

Supplement: Supplementary file 9 [file f49ca43197ba2d0ddcebfcd0.pdf]

Love Plot: Standardized Mean Differences

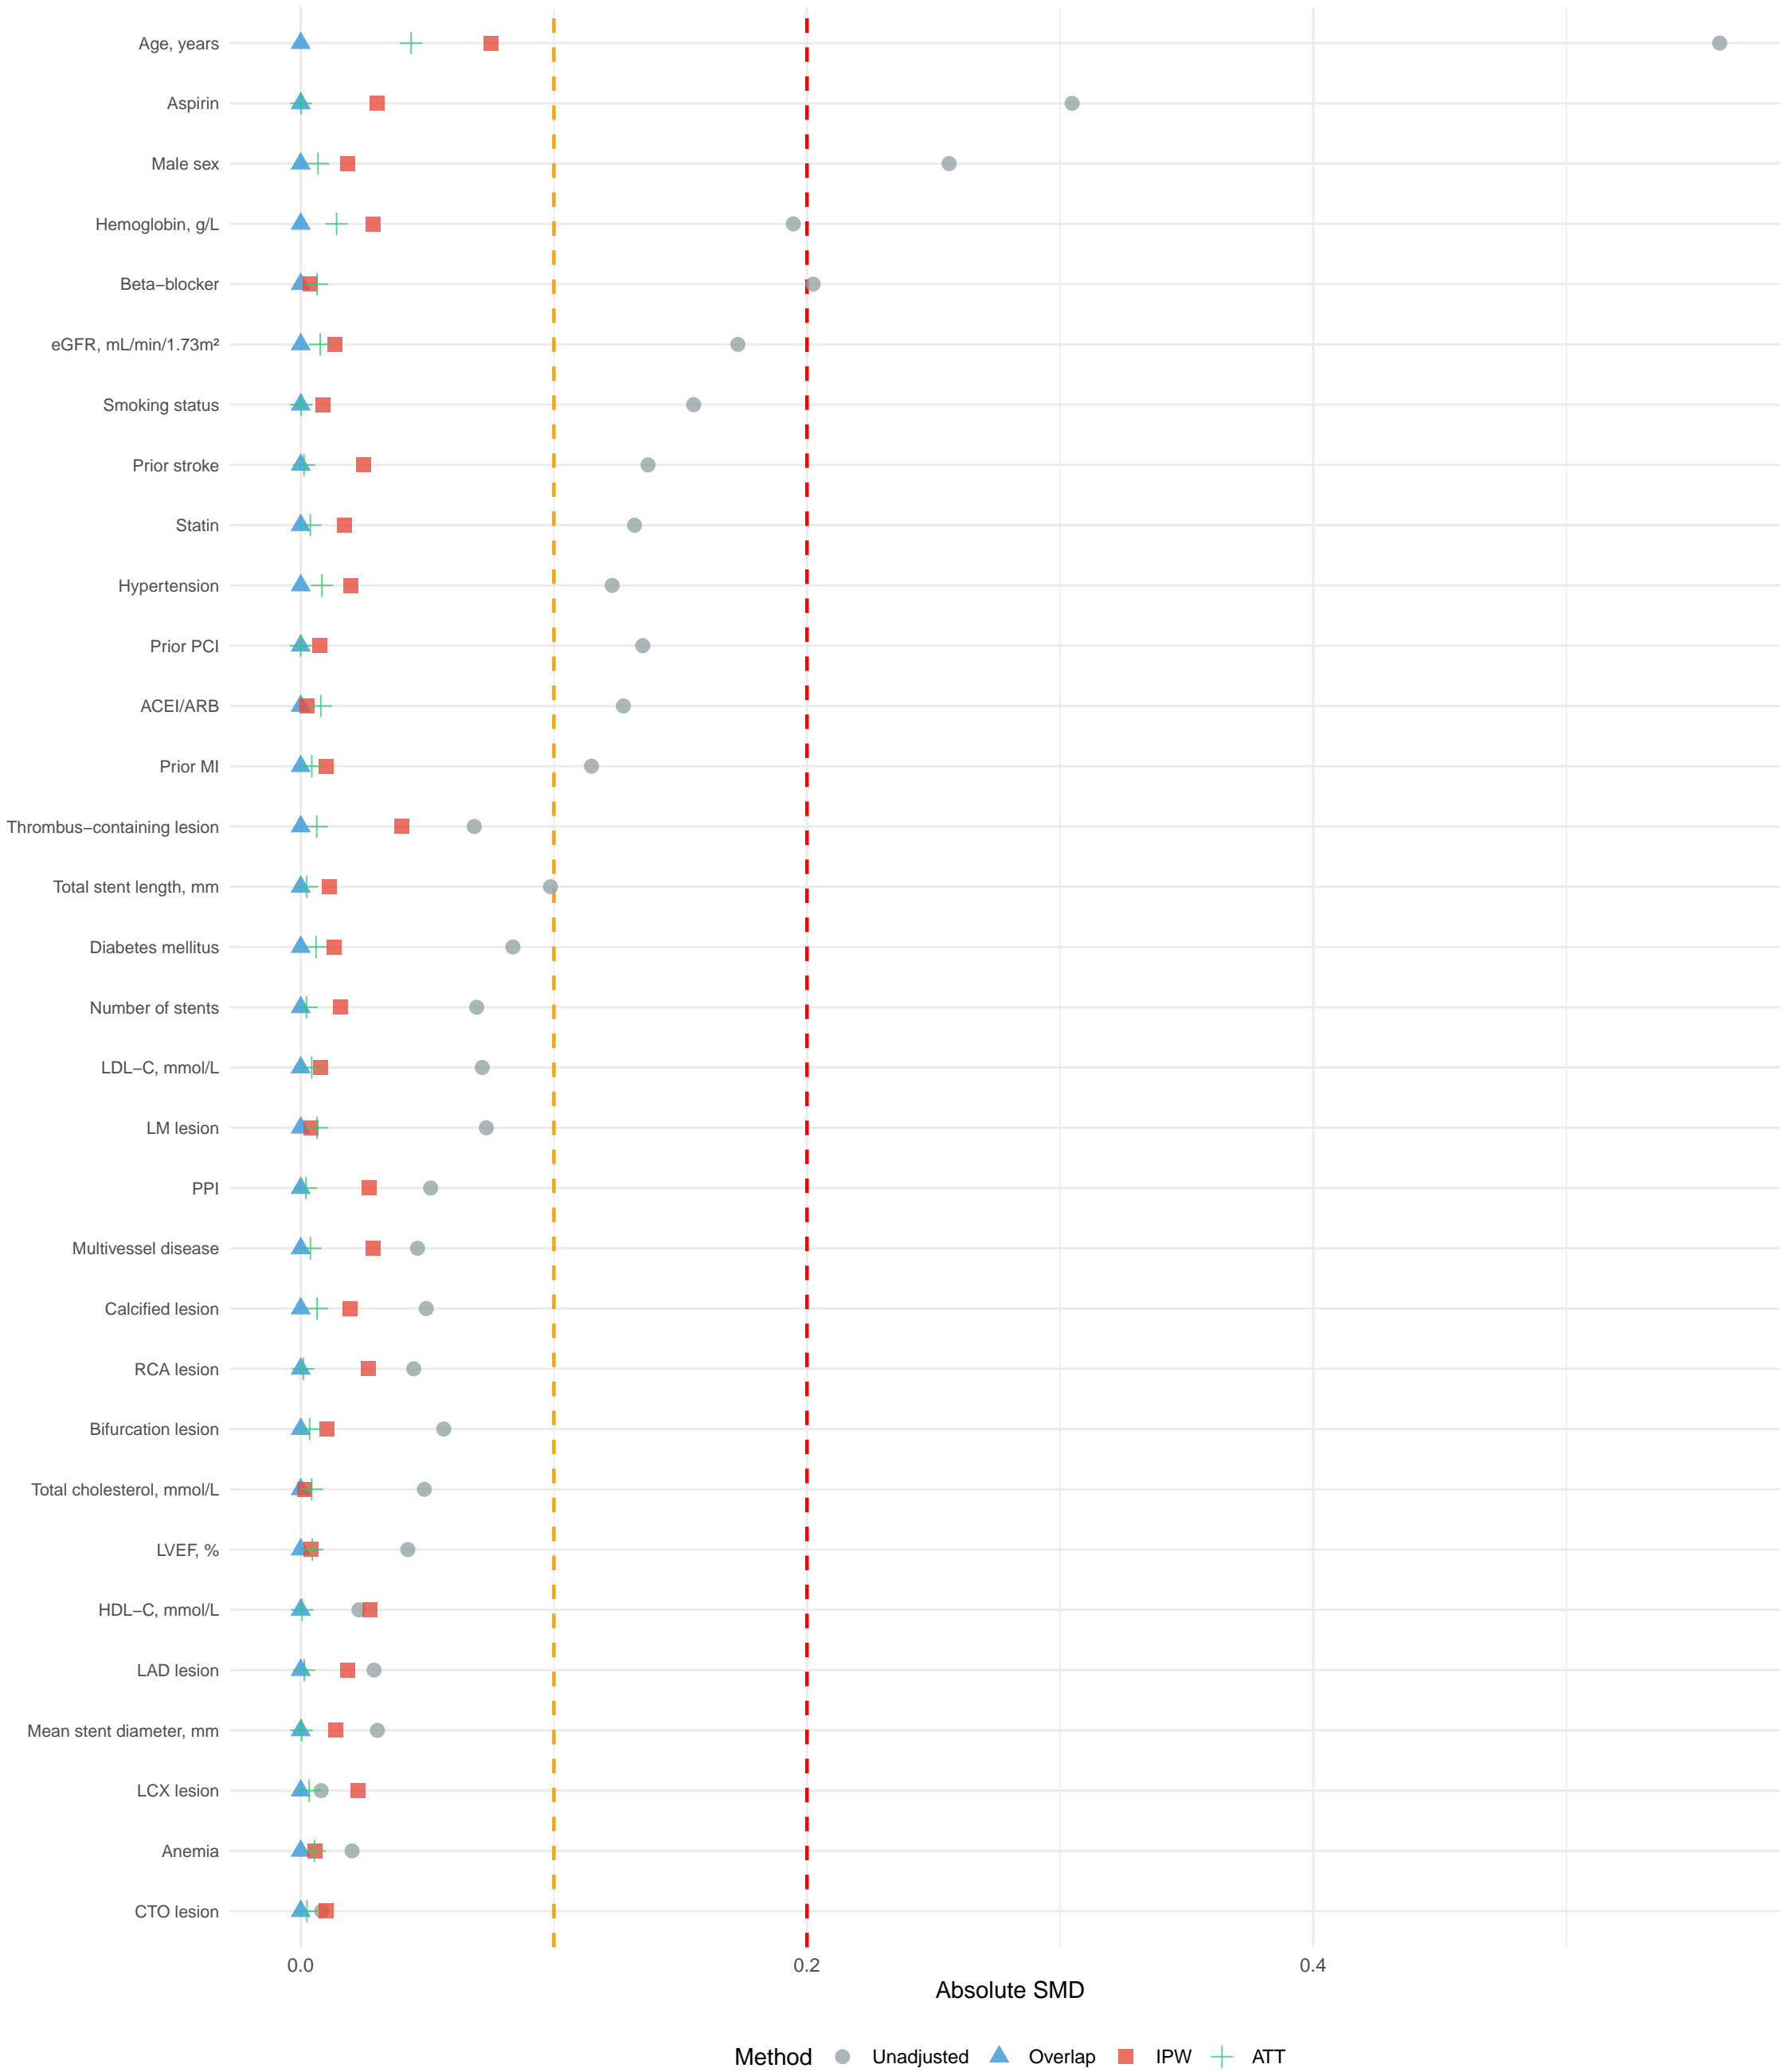

Supplement: Supplementary file 10 [file f7055518d5ef88714ef2dfca.pdf]
